# Supplementary material for: Seasonal and Spatial Variations of Dissolved Organic Matter Biodegradation along the Aquatic Continuum in the Southern Taiga Bog Complex, Western Siberia
Source: MDPI journal article supplement (doi:10.3390/w14233969), 2022-12-06
Supplement: s1 [file s1]

# Supplement of

## Seasonal and spatial variations of dissolved organic matter biodegradation along the aquatic continuum in the southern taiga bog complex, Western Siberia

**Table S1.** Primary data on chemistry of water during experiments (average of 3 replicates  $\pm 1$  SD), together with microbial counts.

| Water sampling date | Location      | Time, day | TBC, *10 <sup>6</sup> cell/ml | pH   | ЭЛ-ТЬ (μS*cm <sup>-1</sup> ) | DOC, mg/L | SUVA <sub>254</sub> | E 365/470 | E 254/436 | E 250/365 | E 280/350 |
|---------------------|---------------|-----------|-------------------------------|------|------------------------------|-----------|---------------------|-----------|-----------|-----------|-----------|
| 3rd August 2020     | Open fen      | 0         | -                             | 3.76 | 44.1                         | 41.7±0.04 | 3.56±0.1            | 6.9       | 24.9      | 6.3       | 3.21      |
|                     |               | 2         | -                             | -    | -                            | 40.4±0.7  | 3.56±0.1            | -         | -         | -         | -         |
|                     |               | 7         | -                             | -    | -                            | 43.2±0.5  | 3.4±0.1             | -         | -         | -         | -         |
|                     |               | 14        | -                             | -    | -                            | 43.6±0.28 | 3.39±0              | -         | -         | -         | -         |
|                     |               | 28        | -                             | -    | -                            | 43.5±0.2  | 3.35±0.1            | -         | -         | -         | -         |
|                     | Forest        | 0         | -                             | 4.37 | 38.6                         | 78.7±3.62 | 4.8±0.2             | 4.0       | 11.6      | 4.2       | 2.55      |
|                     |               | 2         | -                             | -    | -                            | 74.9±0.2  | 4.7±0               | -         | -         | -         | -         |
|                     |               | 7         | -                             | -    | -                            | 77.6±0.4  | 4.5±0.1             | -         | -         | -         | -         |
|                     |               | 14        | -                             | -    | -                            | 78±1      | 4.5±0.1             | -         | -         | -         | -         |
|                     |               | 28        | -                             | -    | -                            | 79.9±0.4  | 4.5±0               | -         | -         | -         | -         |
|                     | Kluch River   | 0         | -                             | 6.1  | 94.8                         | 83.6±1.8  | 4.8±0.1             | 4.6       | 13.4      | 4.6       | 2.67      |
|                     |               | 2         | -                             | -    | -                            | 74.4±1.6  | 4.5±0.1             | -         | -         | -         | -         |
|                     |               | 7         | -                             | -    | -                            | 75.5±0.6  | 4.4±0.1             | -         | -         | -         | -         |
|                     |               | 14        | -                             | -    | -                            | 76.2±1    | 4.3±0.1             | -         | -         | -         | -         |
|                     |               | 28        | -                             | -    | -                            | 75.5±0.3  | 4.2±0.3             | -         | -         | -         | -         |
|                     | Bakchar River | 0         | -                             | 7.54 | 306                          | 53.6±1.2  | 4.2±0.2             | 5.5       | 17.6      | 5.4       | 2.93      |
|                     |               | 2         | -                             | -    | -                            | 50.4±0.2  | 4.2±0               | -         | -         | -         | -         |
|                     |               | 7         | -                             | -    | -                            | 51.2±1.1  | 4.1±0.1             | -         | -         | -         | -         |
|                     |               | 14        | -                             | -    | -                            | 51.5±0.2  | 4±0.1               | -         | -         | -         | -         |
|                     |               | 28        | -                             | -    | -                            | 51.3±1    | 4±0.1               | -         | -         | -         | -         |
| 15th October 2020   | Open fen      | 0         | 1.70E+07                      | 3.94 | 56.9                         | 56.6±0.1  | 2.45±0.2            | 7.50      | 29.41     | 6.83      | 3.37      |
|                     |               | 2         | -                             | 5.3  | 39.8                         | 54.5±3    | 2.8±0               | 5.3       | 20.6      | 6.1       | 3.2       |
|                     |               | 7         | -                             | 5.2  | 37.6                         | 51.5±1.6  | 2.9±0.1             | 5.6       | 22.1      | 6.3       | 3.2       |
|                     |               | 14        | -                             | 5.2  | 40.6                         | 51±0.6    | 3±0.1               | 5.2       | 20.9      | 6.1       | 3.2       |
|                     |               | 28        | -                             | 5.1  | 41.0                         | 52.5±1.5  | 3±0                 | 6.2       | 23.5      | 6.2       | 3.2       |
|                     | Forest        | 0         | 2.65E+07                      | 4.62 | 44.5                         | 64.5±0.1  | 4.02±0.1            | 5.38      | 16.26     | 4.81      | 2.74      |
|                     |               | 2         | -                             | 5.3  | 36.7                         | 62.7±2.4  | 4.2±0.4             | 4.9       | 14.0      | 4.5       | 2.6       |
|                     |               | 7         | -                             | 5.6  | 39.8                         | 58.7±2    | 4.7±0.1             | 4.8       | 13.7      | 4.5       | 2.6       |
|                     |               | 14        | -                             | 5.5  | 39.2                         | 58.1±0.3  | 4.6±0.06            | 4.9       | 13.9      | 4.4       | 2.6       |
|                     |               | 28        | -                             | 5.64 | 38.63                        | 58±0.85   | 4.82±0.1            | 4.47      | 12.81     | 4.28      | 2.58      |
|                     | Tall ryam     | 0         | 1.19E+07                      | 4.48 | 43.5                         | 64.4±0.1  | 3.73±0.1            | 5.54      | 16.54     | 4.85      | 2.76      |
|                     |               | 2         | -                             | 4.7  | 37.9                         | 60.8±3.6  | 4±0.2               | 4.8       | 14.2      | 4.6       | 2.7       |
|                     |               | 7         | -                             | 4.70 | 38.27                        | 57.8±0.46 | 4.22±0.2            | 4.91      | 14.66     | 4.61      | 2.69      |
|                     |               | 14        | -                             | 5.0  | 38.9                         | 57.5±0.2  | 4.1±0.1             | 5.0       | 14.6      | 4.6       | 2.7       |
|                     |               | 28        | -                             | 4.9  | 40.1                         | 58.3±0.8  | 4.3±0.1             | 5.1       | 14.8      | 4.5       | 2.7       |
|                     | Kluch River   | 0         | 5.50E+06                      | 7.08 | 335                          | 43.9±0.1  | 3.73±0.1            | 6.53      | 22.34     | 6.04      | 3.17      |
|                     |               | 2         | -                             | 8.4  | 329.0                        | 43±0.6    | 3.6±0.1             | 6.4       | 21.1      | 5.8       | 3.1       |
|                     |               | 7         | -                             | 8.4  | 330.5                        | 43.2±0.6  | 3.8±0.1             | 5.8       | 19.2      | 5.6       | 3.0       |
|                     |               | 14        | -                             | 8.3  | 333.5                        | 43.4±0.6  | 3.7±0.1             | 6.7       | 20.8      | 5.8       | 3.1       |
|                     |               | 28        | -                             | 8.4  | 341.0                        | 43±0.8    | 3.8±0.1             | 6.1       | 20.2      | 5.7       | 3.1       |
|                     | Bakchar River | 0         | 4.38E+06                      | 7.8  | 580.0                        | 23.2±1.5  | 3.4±0.1             | 8.6       | 29.7      | 7.0       | 3.6       |
|                     |               | 2         | -                             | 8.7  | 579.3                        | 21.4±0.8  | 3.3±0.2             | 6.9       | 24.1      | 6.3       | 3.4       |
|                     |               | 7         | -                             | 8.6  | 582.0                        | 20.4±0.6  | 3.4±0               | 6.4       | 23.5      | 6.3       | 3.5       |
|                     |               | 14        | -                             | 8.6  | 587.7                        | 21.9±1    | 3.2±0.2             | 8.4       | 26.2      | 6.5       | 3.5       |
|                     |               | 28        | -                             | 8.6  | 595.7                        | 21.1±0.5  | 3.4±0               | 6.5       | 23.9      | 6.2       | 3.5       |
| 20th May 2020       | Open fen      | 0         | 1.6E+06                       | 5.7  | 49.3                         | 45.4±0.1  | 3.4±0               | 5.4       | 18.8      | 5.7       | 3.1       |
|                     |               | 2         | -                             | 6.0  | 48.4                         | 44.3±0.1  | 3.4±0               | 4.8       | 17.8      | 5.7       | 3.1       |
|                     |               | 7         | -                             | 6.1  | 48.9                         | 35.3±0.1  | 4.2±0               | 5.5       | 18.6      | 5.6       | 3.0       |

|  |               |    |         |     |       |          |          |     |      |     |     |
|--|---------------|----|---------|-----|-------|----------|----------|-----|------|-----|-----|
|  |               | 14 | -       | 6.8 | 50.6  | 33.7±0.1 | 4.4±0    | 5.8 | 19.8 | 5.7 | 3.1 |
|  |               | 21 | -       | 6.9 | 61.3  | 41.7±0.1 | 8±0      | 4.0 | 11.5 | 4.3 | 2.6 |
|  |               | 28 | -       | 6.8 | 43.3  | 42.3±0.1 | 3.5±0    | 4.7 | 16.2 | 5.4 | 3.0 |
|  | Forest        | 0  | 1.3E+06 | 4.1 | 37.2  | 58.7±1.2 | 4.4±0.2  | 5.6 | 15.7 | 4.6 | 2.7 |
|  |               | 2  | -       | 5.8 | 35.8  | 60.1±2.3 | 4.4±0.1  | 4.8 | 13.4 | 4.5 | 2.6 |
|  |               | 7  | -       | 6.0 | 38.9  | 50.7±0.4 | 6±0      | 5.1 | 14.0 | 4.5 | 2.6 |
|  |               | 14 | -       | 5.4 | 35.5  | 50±3.1   | 5.3±0.4  | 6.0 | 15.6 | 4.6 | 2.6 |
|  |               | 21 | -       | 6.7 | 38.1  | 59.5±0.7 | 4.8±0.1  | 4.7 | 12.7 | 4.3 | 2.5 |
|  |               | 28 | -       | 7.0 | 40.1  | 59.7±0.6 | 4.7±0    | 4.7 | 13.0 | 4.3 | 2.6 |
|  |               | 0  | -       | 3.9 | 44.5  | 59.3±0.1 | 4.7±0.1  | 5.7 | 15.8 | 4.7 | 2.7 |
|  | Tall ryam     | 2  | -       | 5.2 | 37.0  | 62.2±0.1 | 4.4±0.1  | 5.6 | 15.6 | 4.7 | 2.7 |
|  |               | 7  | -       | 4.7 | 37.9  | 57.4±0.1 | 5.7±0.1  | 5.0 | 14.1 | 4.6 | 2.7 |
|  |               | 14 | -       | 4.8 | 37.4  | 55.9±0.1 | 5±0.1    | 5.9 | 15.6 | 4.6 | 2.7 |
|  |               | 21 | -       | 5.4 | 38.6  | 59.6±0.1 | 4.8±0.1  | 5.0 | 13.7 | 4.4 | 2.6 |
|  |               | 28 | -       | 5.1 | 38.2  | 62.9±0.1 | 4.5±0.1  | 5.0 | 14.2 | 4.5 | 2.7 |
|  |               | 0  | 1.1E+06 | 7.6 | 82.5  | 66.4±0.1 | 4.7±0.1  | 4.9 | 13.6 | 4.6 | 2.7 |
|  | Kluch River   | 2  | -       | 6.2 | 73.3  | 61.1±0.1 | 5.3±0.1  | 5.1 | 13.8 | 4.6 | 2.7 |
|  |               | 7  | -       | 6.8 | 82.3  | 58.2±0.1 | 5.3±0.1  | 4.9 | 13.5 | 4.5 | 2.6 |
|  |               | 14 | -       | 8.0 | 81.4  | 53.4±0.1 | 6±0.1    | 5.0 | 13.7 | 4.6 | 2.7 |
|  |               | 21 | -       | 7.6 | 82.2  | 61±0.1   | 4±0      | 5.1 | 15.9 | 5.0 | 2.8 |
|  |               | 28 | -       | 7.7 | 87.3  | 64.3±0.1 | 5.3±0    | 4.4 | 12.5 | 4.5 | 2.6 |
|  |               | 0  | 1.9E+06 | 6.4 | 226   | 50.6±0.6 | 4.4±0.1  | 5.1 | 15.5 | 5.0 | 2.9 |
|  | Bakchar River | 2  | -       | 7.4 | 238   | 50±0.2   | 4.2±0.1  | 5.2 | 15.2 | 5.0 | 2.8 |
|  |               | 7  | -       | 6.3 | 235.5 | 45±1     | 4.72±0.1 | 4.8 | 14.6 | 5.0 | 2.8 |
|  |               | 14 | -       | 8.2 | 240.5 | 38.5±0   | 4.74±0.1 | 6.1 | 16.9 | 5.1 | 2.9 |
|  |               | 21 | -       | 7.9 | 246   | 46.4±0.9 | 4.8±0.1  | 4.8 | 14.7 | 5.0 | 2.8 |
|  |               | 28 | -       | 7.9 | 246.5 | 47.4±0.2 | 4.8±0.1  | 5.1 | 14.8 | 4.9 | 2.8 |

**Table S2.** Statistical differences in physico-chemical parameters and UV-visible absorbance data between the seasons for each water sampling location. The *p-values* are determined by Kruskal–Wallis test (1<sup>st</sup> line) and Mann–Whitney U test (2<sup>nd</sup> line) for each parameter. Note that in August only DOC, SUVA<sub>254</sub> and normalized molecular weight (WAMW) are present. Red indicates significant *p-values* (i.e. < 0.05).

| Parameter                                                        | Open fen         |              |                | Forest           |              |                | Tall<br>ryam | Kluch River       |              |                | Bakchar River     |           |                |
|------------------------------------------------------------------|------------------|--------------|----------------|------------------|--------------|----------------|--------------|-------------------|--------------|----------------|-------------------|-----------|----------------|
|                                                                  | May –<br>Aug     | May–<br>Oct. | Aug. –<br>Oct. | May –<br>Aug     | May–<br>Oct. | Aug. –<br>Oct. | May–<br>Oct. | May –<br>Aug      | May–<br>Oct. | Aug. –<br>Oct. | May –<br>Aug      | May–Oct.  | Aug. –<br>Oct. |
| Cond<br>( $\mu\text{S cm}^{-1}$ )                                |                  | p=0.003      |                |                  | p=0.51       |                | p=0.53       |                   | p=0.0001     |                |                   | p=0.00001 |                |
| pH                                                               |                  | p=0.03       |                |                  | p=0.13       |                | p=0.31       |                   | p=0.0001     |                |                   | p=0.00006 |                |
| DOC<br>(mg L <sup>-1</sup> )                                     | H=14.9; p=0.001  |              |                | H=11.4; p=0.003  |              |                | p=0.015      | H=31,7; p=0.00001 |              |                | H=34,8; p=0.00001 |           |                |
|                                                                  | p=0.35           | p=0.005      | p=0.001        | p=0.0001         | p=0.49       | p=0.0001       |              | p=0.00001         | p=0.001      | p=0.00001      | p=0.00001         | p=0.00001 | p=0.00001      |
| SUVA <sub>254</sub><br>(L mgC <sup>-1</sup><br>m <sup>-1</sup> ) | H=14.8; p=0.001  |              |                | H=3.45; p=0.18   |              |                | p=0.007      | H=24,5; p=0.00001 |              |                | H=34,9; p=0.00001 |           |                |
|                                                                  | p=0.85           | p=0.005      | p=0.001        |                  |              |                |              | p=0.0003          | p=0.001      | p=0.00001      | p=0.00001         | p=0.00001 | p=0.00001      |
| TBC<br>(cell mL <sup>-1</sup> )                                  |                  | p=0.007      |                |                  | p=0.001      |                | p=0.001      |                   | p=0.008      |                |                   | p=0.01    |                |
| E250:E365                                                        |                  | p=0.005      |                |                  | p=0.40       |                | p=0.41       |                   | p=0.0001     |                |                   | p=0.00001 |                |
| E254:E436                                                        |                  | p=0.002      |                |                  | p=0.84       |                | p=0.92       |                   | p=0.0001     |                |                   | p=0.00001 |                |
| WAMW,<br>Da                                                      | H=17.6; p=0.0002 |              |                | H=17.6; p=0.0002 |              |                | p=0.008      | H=24; p=0.00001   |              |                | H=31,6; p=0.00001 |           |                |
|                                                                  | p=0.004          | p=0.005      | p=0.001        | p=0.002          | p=0.20       | p=0.0001       |              | p=0.03            | p=0.0001     | p=0.00001      | p=0.005           | p=0.00001 | p=0.00001      |
| S <sub>275-295</sub>                                             |                  | p=0.81       |                |                  | p=0.011      |                | p=0.007      |                   | p=0.0001     |                |                   | p=0.00001 |                |
| S <sub>350-400</sub>                                             |                  | p=0.005      |                |                  | p=0.93       |                | p=0.92       |                   | p=0.001      |                |                   | p=0.0001  |                |
| S <sub>R</sub>                                                   |                  | p=0.005      |                |                  | p=0.01       |                | p=0.008      |                   | p=0.0001     |                |                   | p=0.00001 |                |

**Table S3.** The DOC rates removal at 28 day of incubation ( $R_{DOC28}$ ), *p-values* and  $R^2$  coefficients along the aquatic continuum by season on the total period of incubation. Red indicates significant *p-values* (i.e. < 0.05).

| Season  | Location      | $R_{DOC28}$ (mg C L <sup>-1</sup> d <sup>-1</sup> ) | <i>p-value</i> | $R^2$ |
|---------|---------------|-----------------------------------------------------|----------------|-------|
| May     | Open fen      | 0.26 ± 0.03                                         | 0.043          | 0.43  |
|         | Forest        | 0.25 ± 0.1                                          | 0.003          | 0.59  |
|         | Tall ryam     | 0.138 ± 0.01                                        | 0.69           | 0.016 |
|         | Kluch River   | 0.13 ± 0.01                                         | 0.81           | 0.01  |
|         | Bakchar River | 0.09 ± 0.05                                         | 0.44           | 0.06  |
| August  | Open fen      | 0.22 ± 0.05                                         | 0.003          | 0.76  |
|         | Forest        | 0.15 ± 0.08                                         | 0.014          | 0.41  |
|         | Kluch River   | 0.05 ± 0.004                                        | 0.044          | 0.35  |
|         | Bakchar River | 0.12 ± 0.05                                         | 0.001          | 0.59  |
| October | Open fen      | 0.11 ± 0.08                                         | 0.043          | 0.49  |
|         | Forest        | 0.21 ± 0.02                                         | 0.002          | 0.55  |
|         | Tall ryam     | 0.1 ± 0.01                                          | 0.16           | 0.19  |
|         | Kluch River   | 0.01 ± 0.005                                        | 0.65           | 0.021 |
|         | Bakchar River | 0.01 ± 0.002                                        | 0.7            | 0.01  |

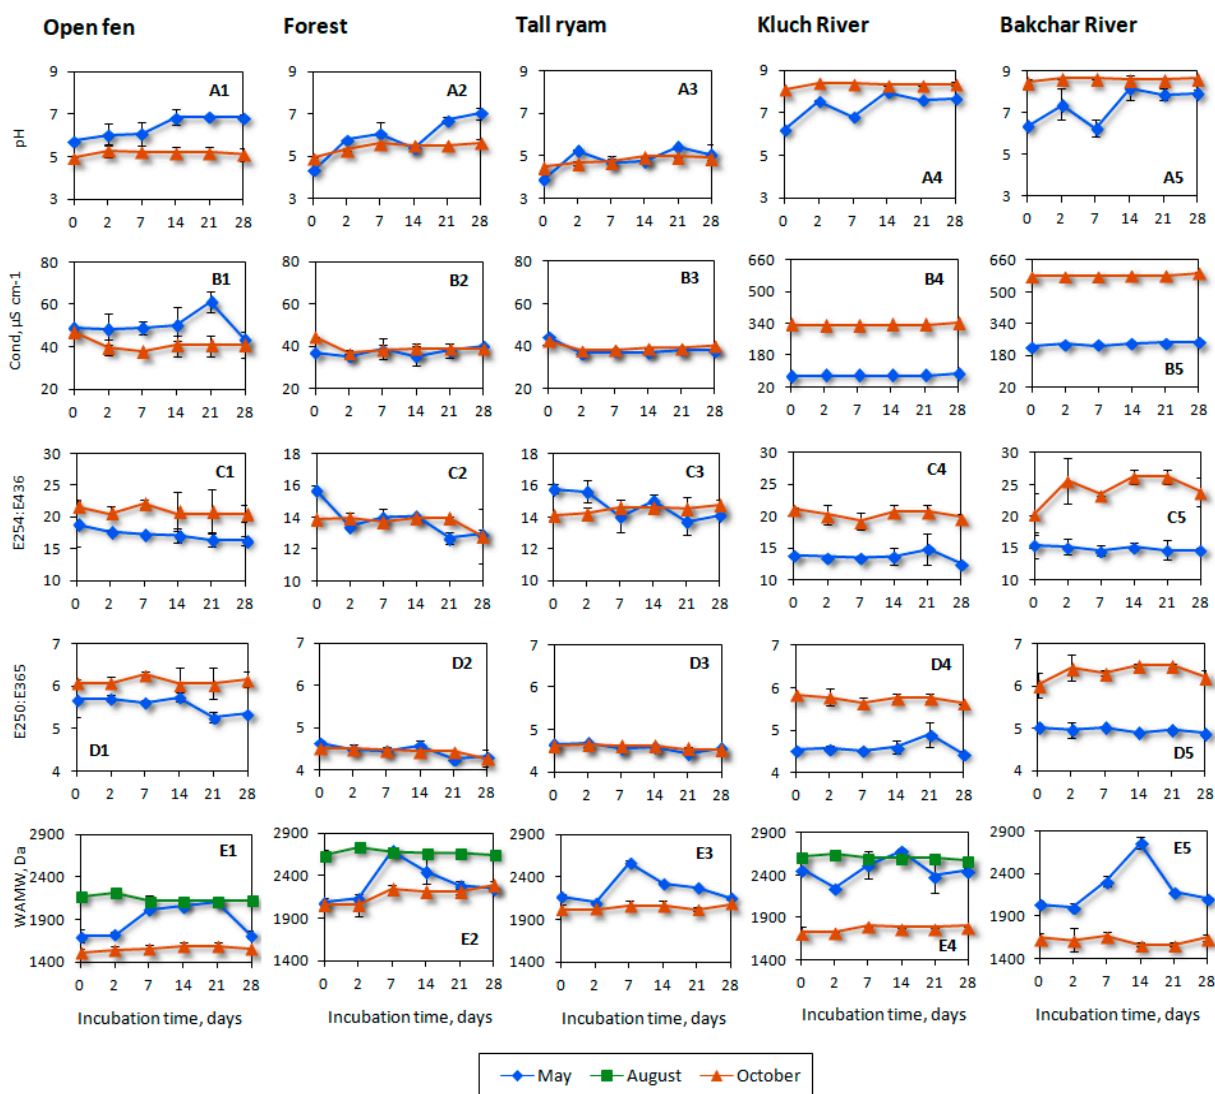

**Figure S1.** Evolution of pH (A), specific conductivity (B), E254:E436 (C), E250:E365 (D) ratios, and WAMW (E) along the aquatic continuum by season during incubation time. The error bars are  $\pm 1$  SD of the triplicates unless within the symbol size.

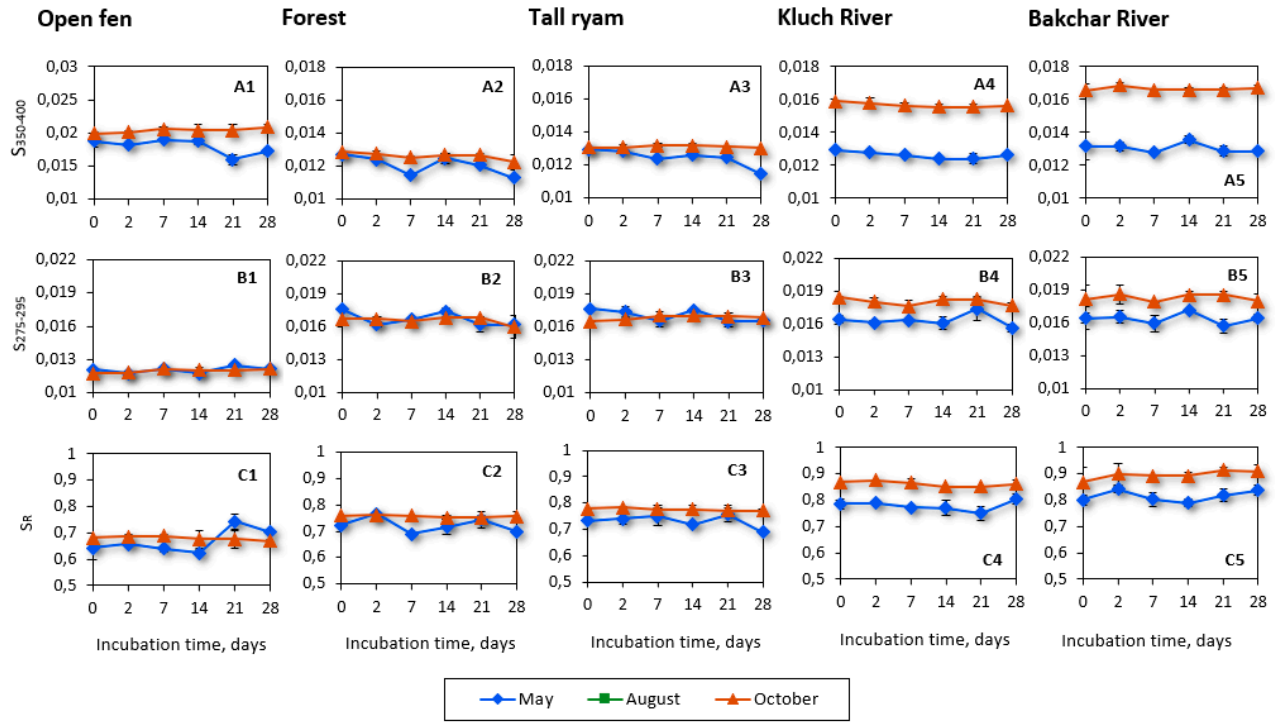

**Figure S2.** Evolution of spectral ratios  $S_{275-295}$  (A) and  $S_{350-400}$  (B) as well as the slope ratio  $S_R$ , equaled to  $S_{275-295}/S_{350-400}$  (C) along the aquatic continuum by season during incubation time. The error bars are  $\pm 1$  SD of the triplicates unless within the symbol size.
